# Supplementary material for: Transgelin-2, a novel cancer stem cell-related biomarker, is a diagnostic and therapeutic target for biliary tract cancer
Source: Springer Nature journal article supplement (doi:10.1186/s12885-024-12082-3), 2024-03-20

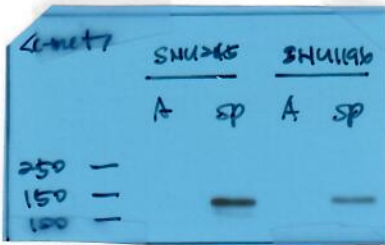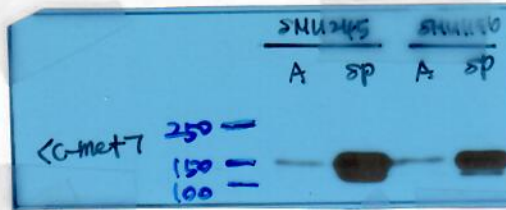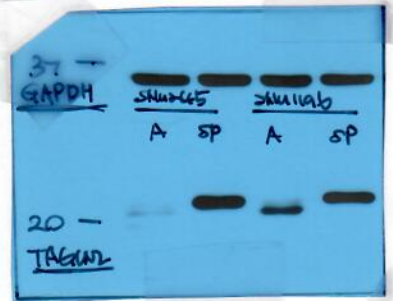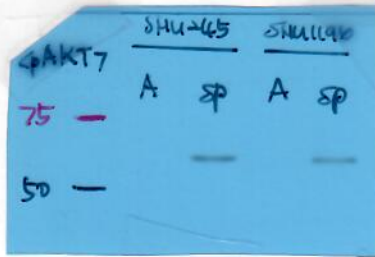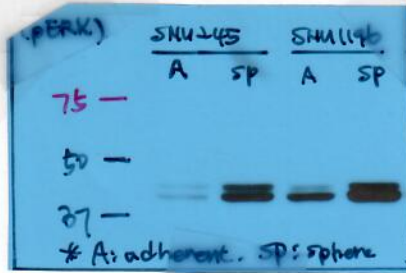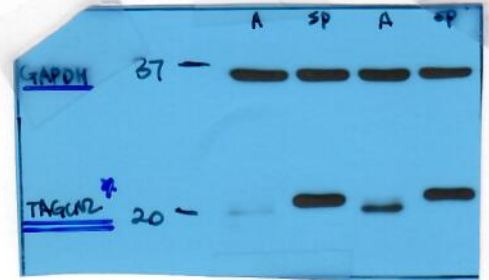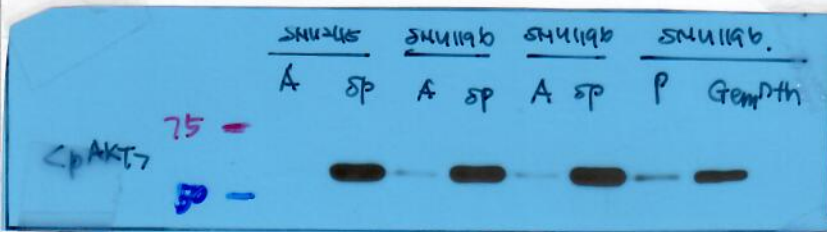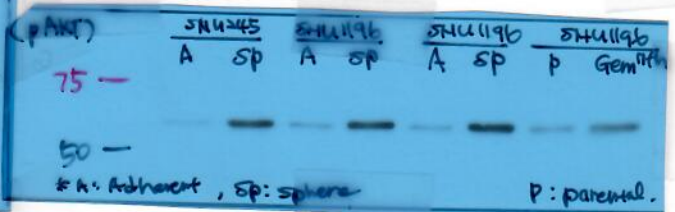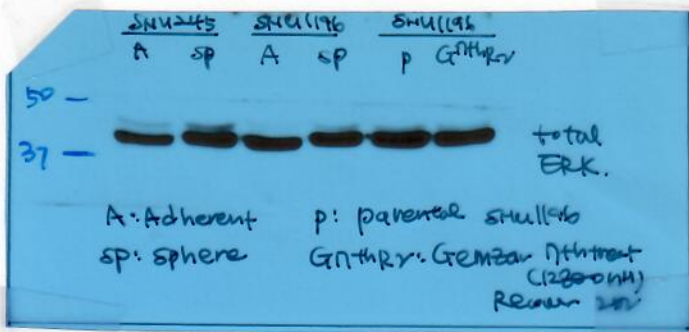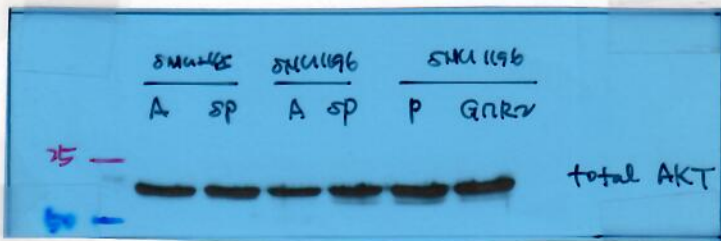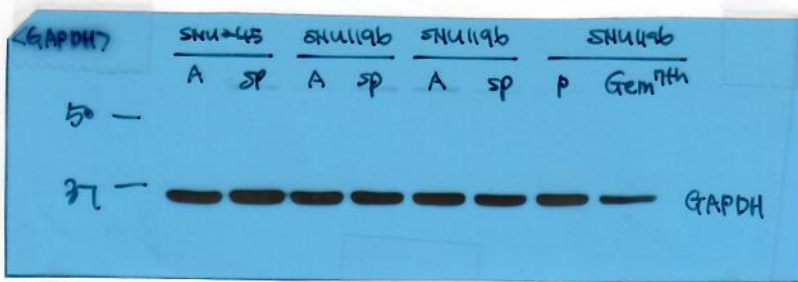

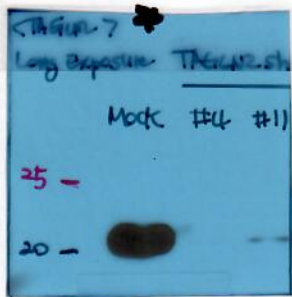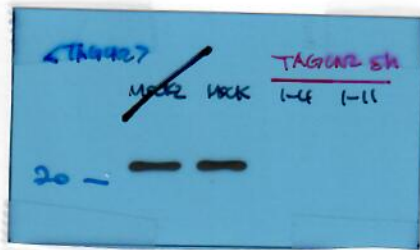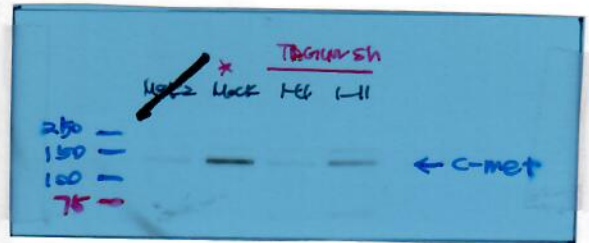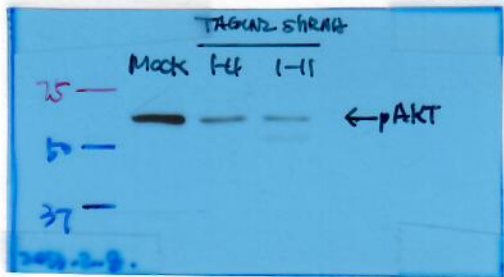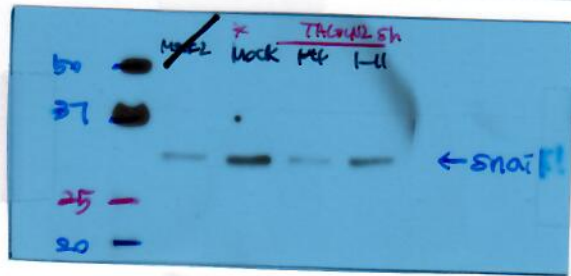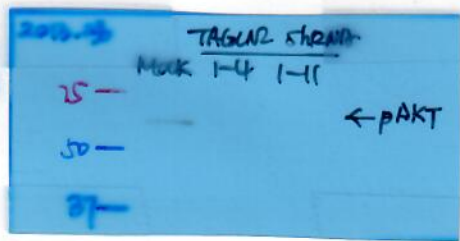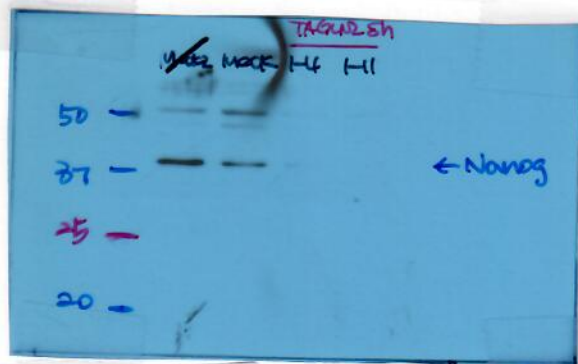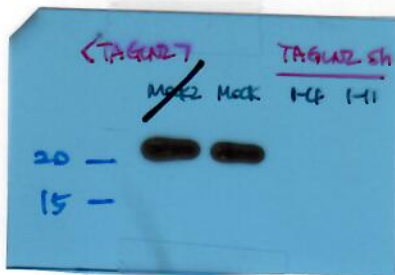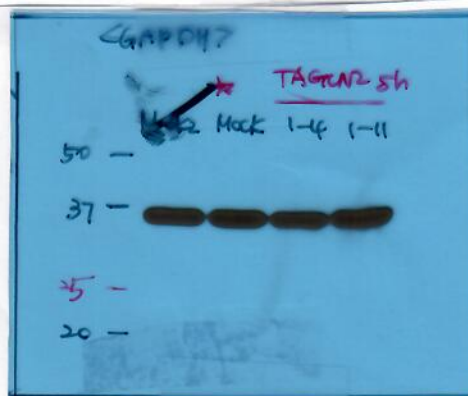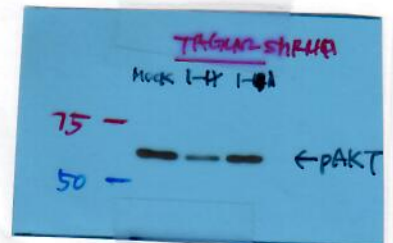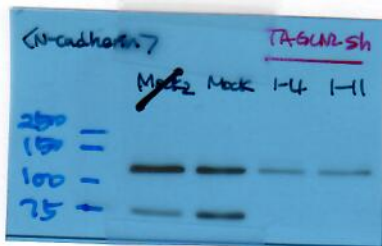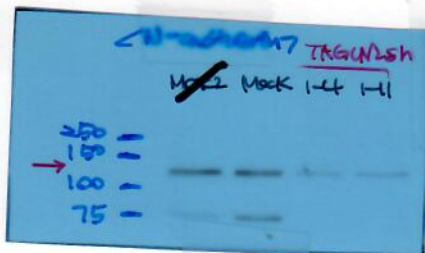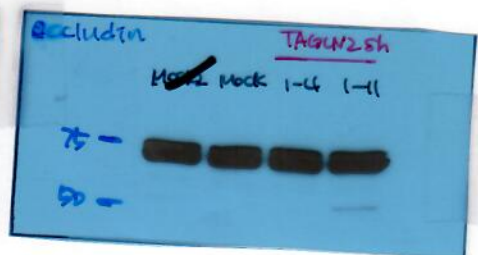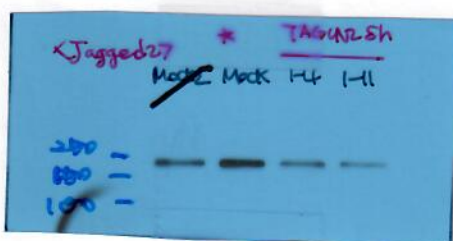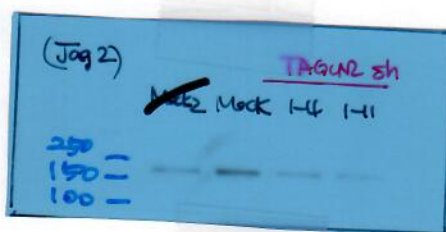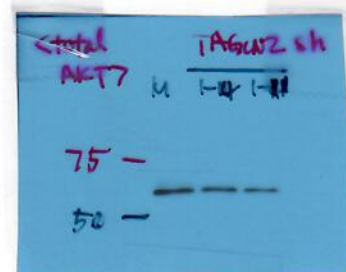



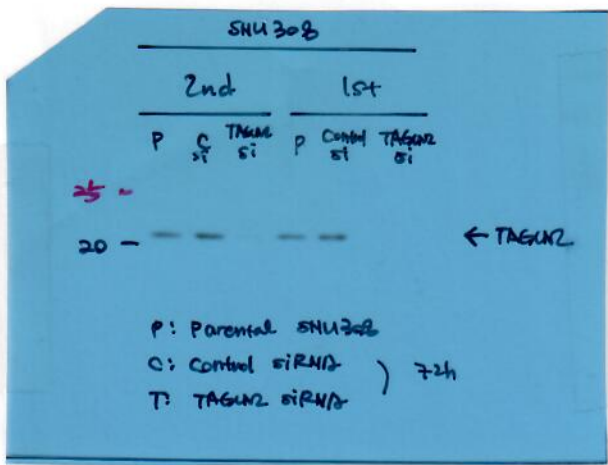

\* SHU308 cell line.

\* TAGLN2 siRNA 33nM. 72hr. transfection.

\* protein 20µg loading

(2hr. 4°C)

P: parental SHU308

C: control siRNA

T: TAGLN2 siRNA

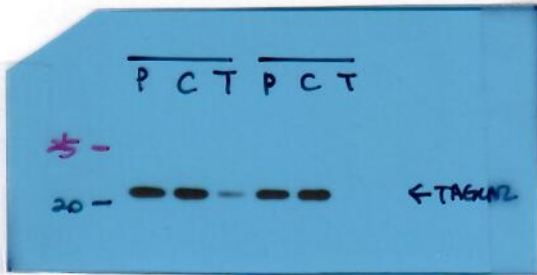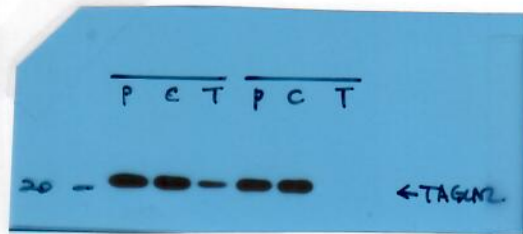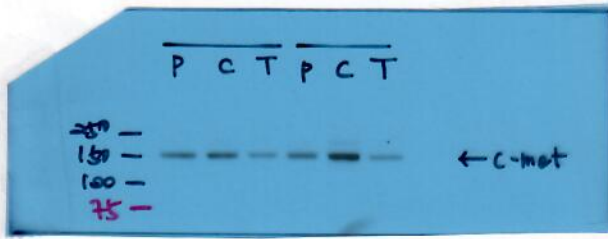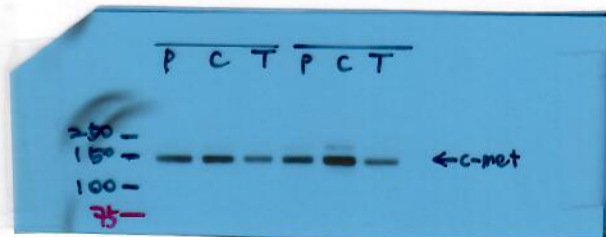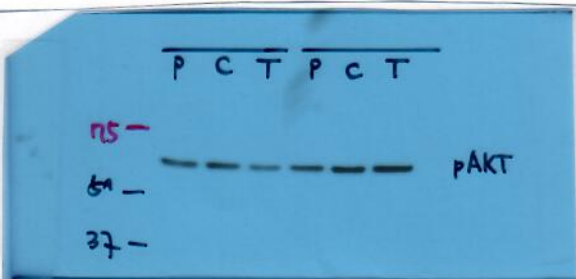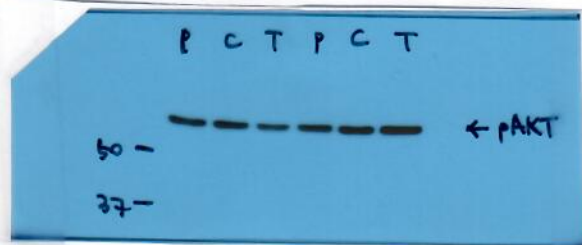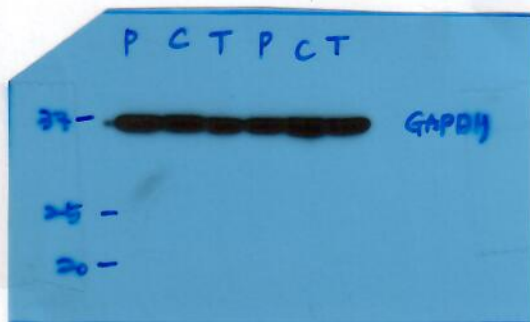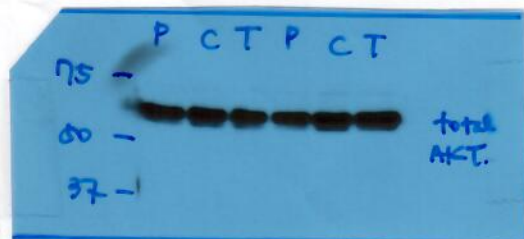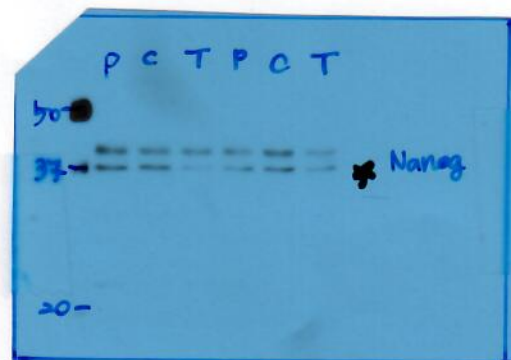

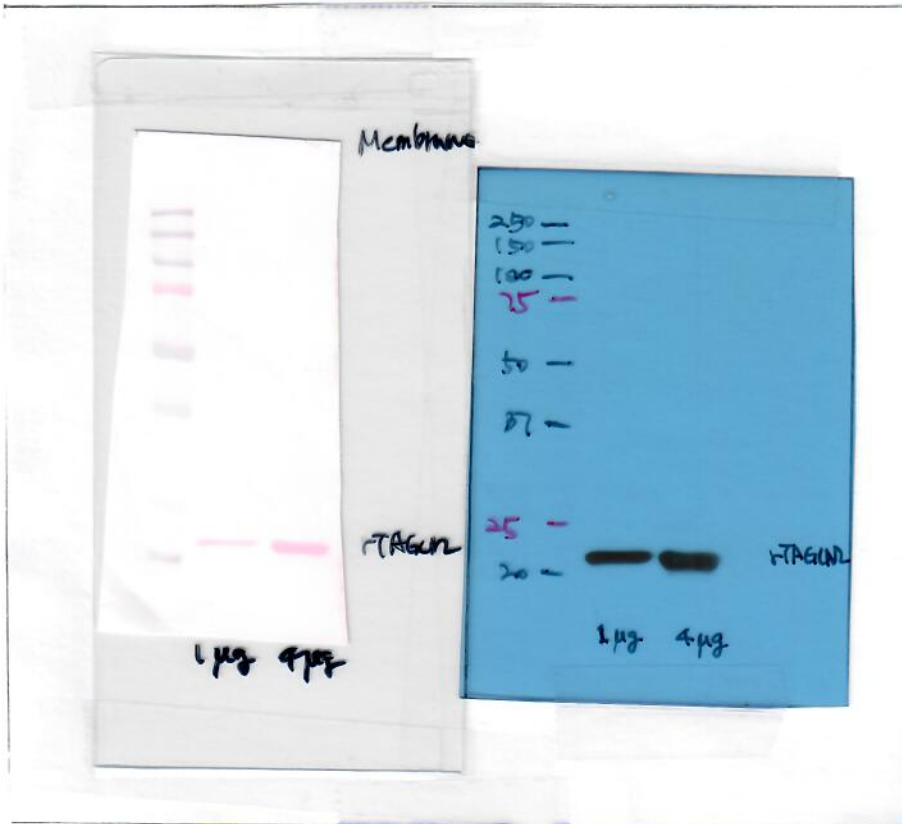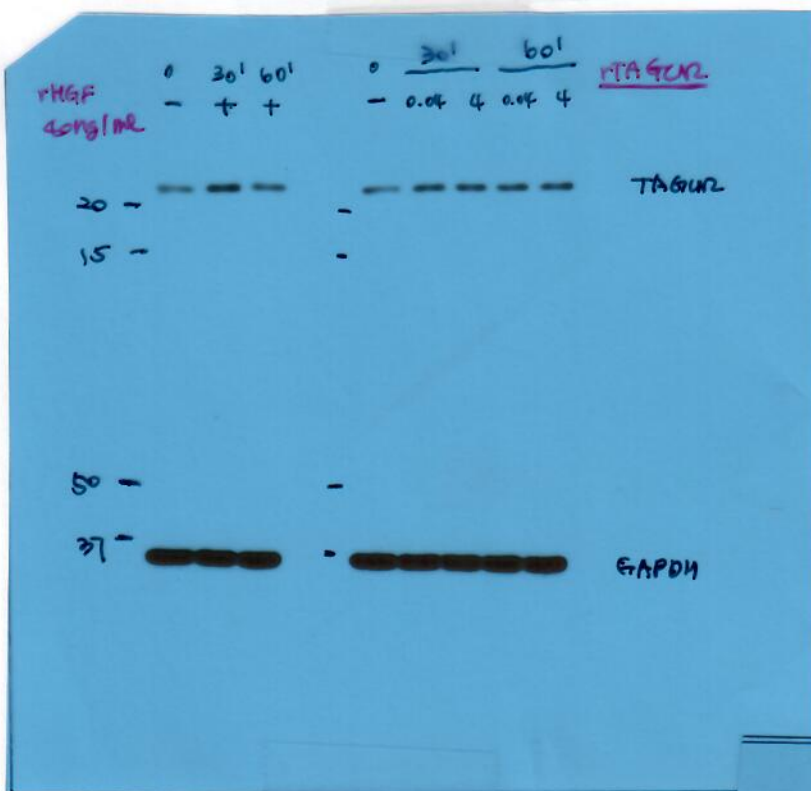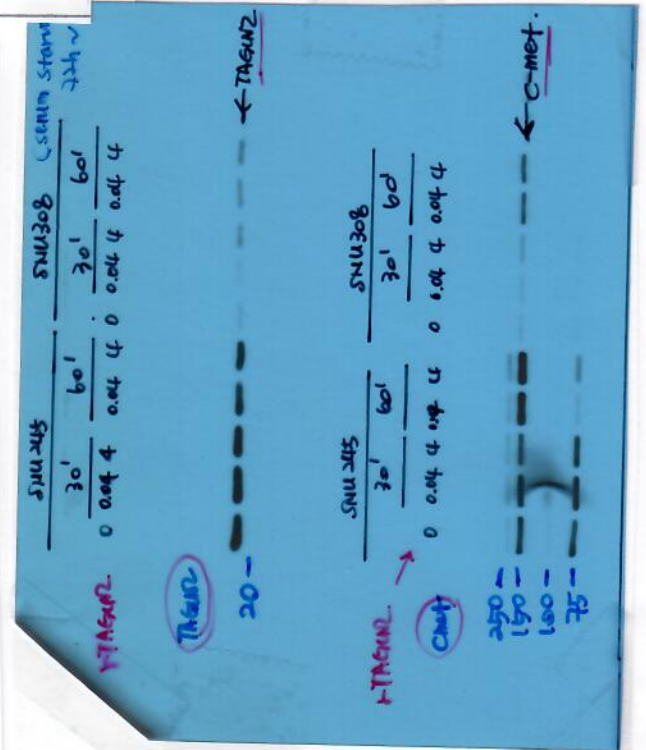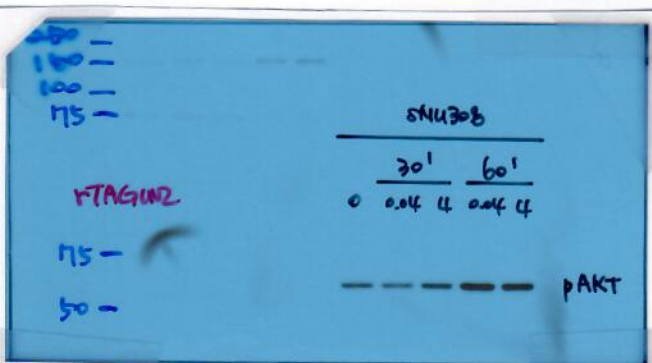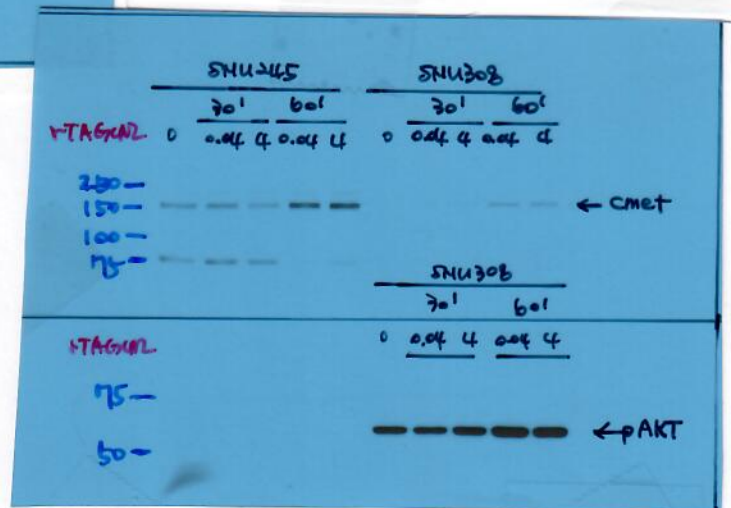



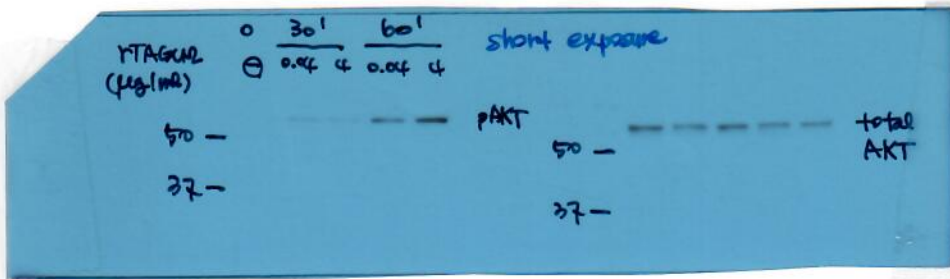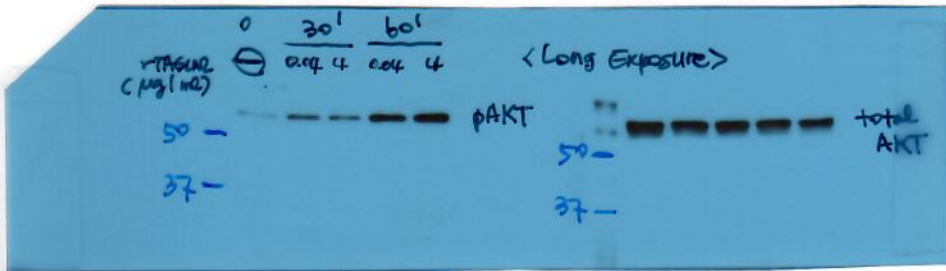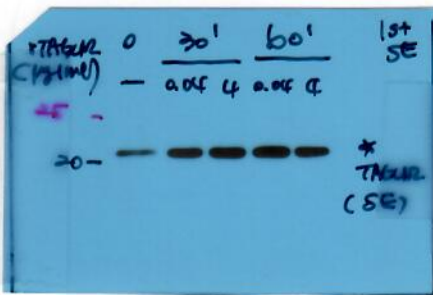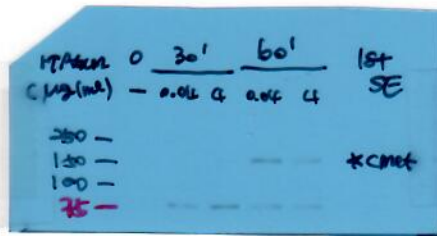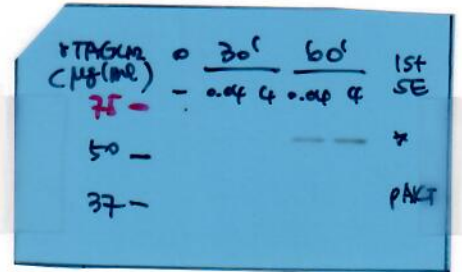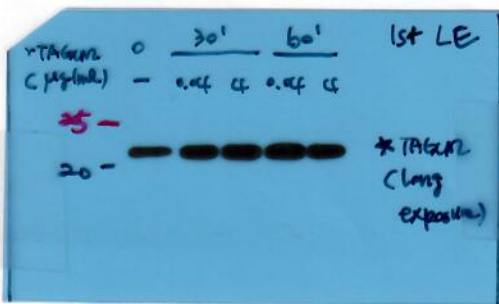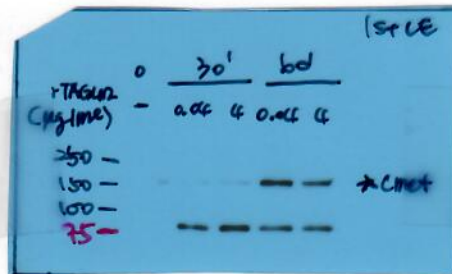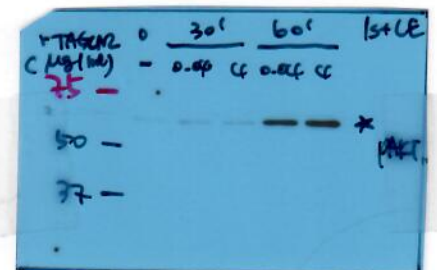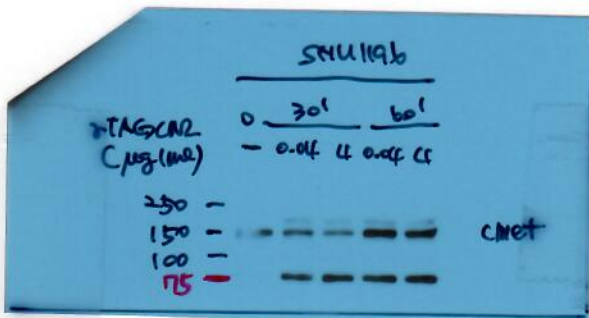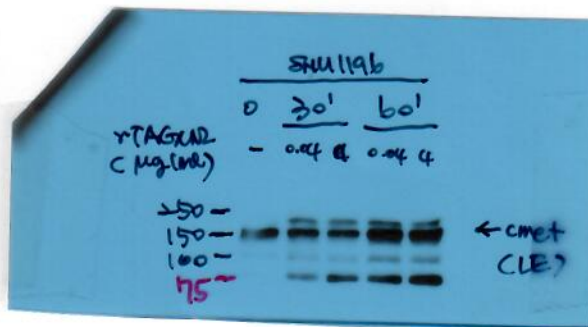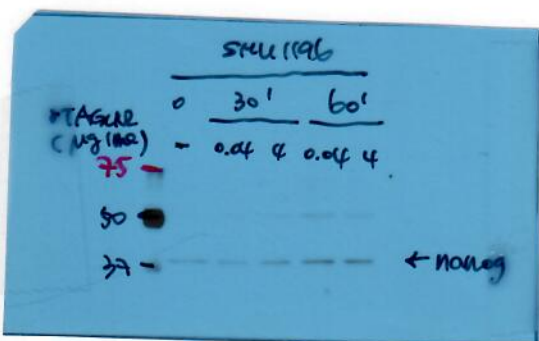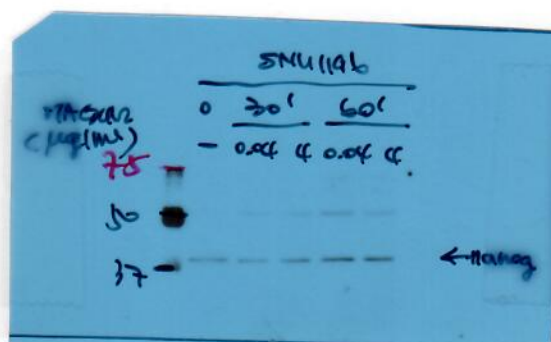





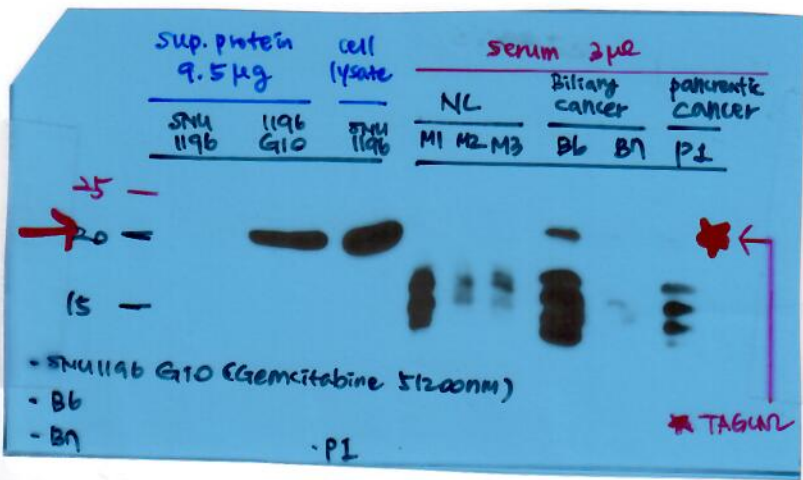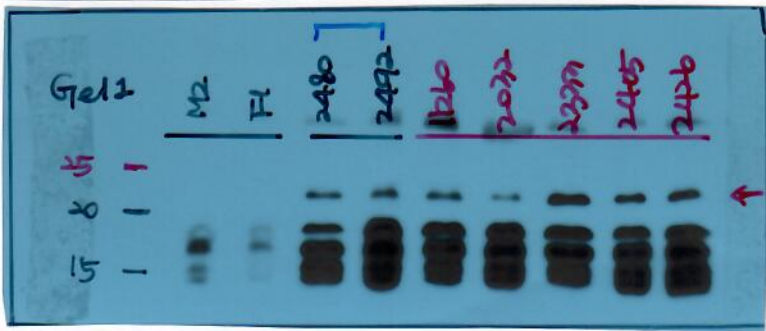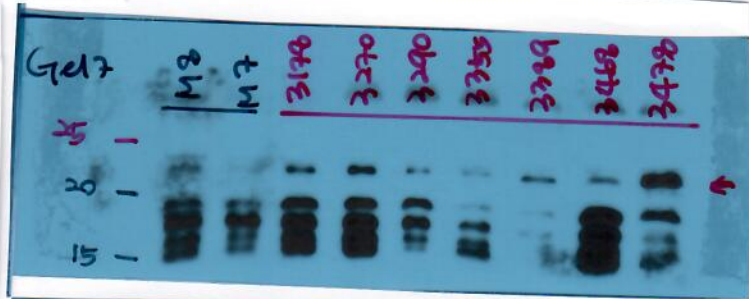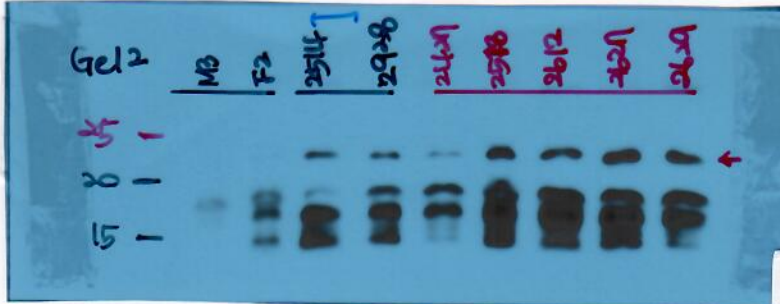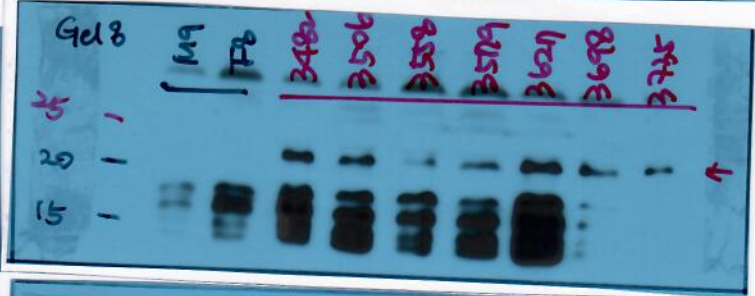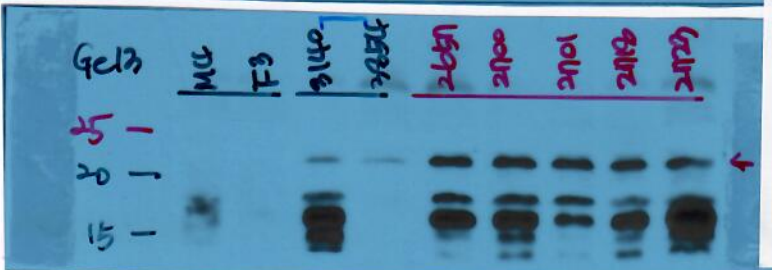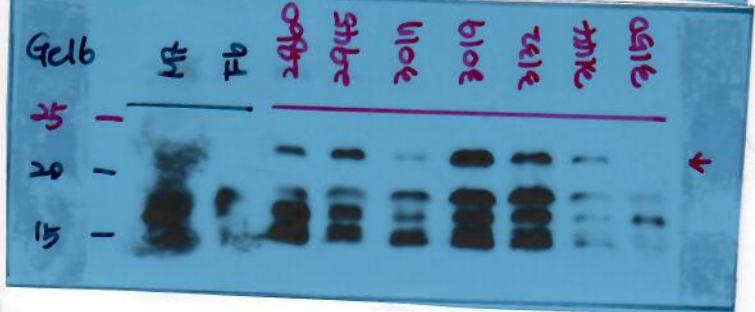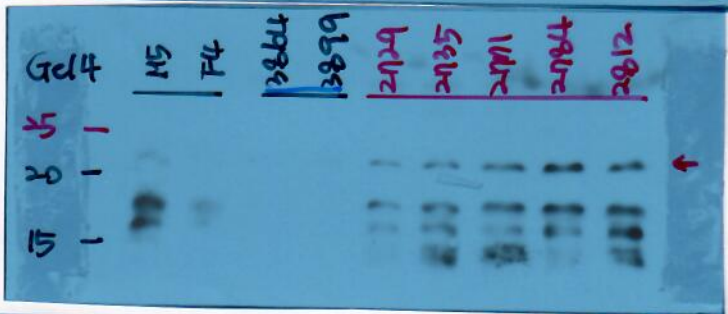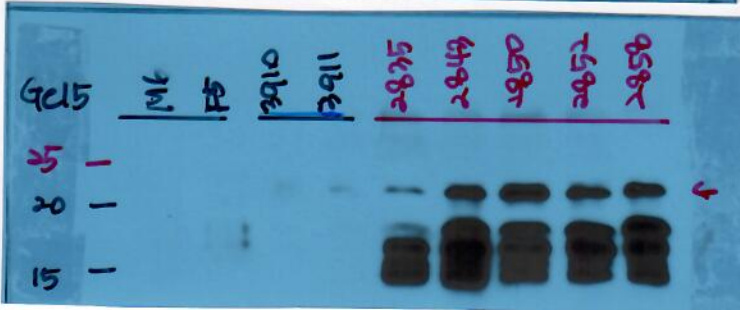



20150203 develop. 1min 30sec Exposure.

정량화하기 위한 TAGM2 검사. (Serum)

- ① 정상 Normal 41 개이스 (Normal)
- ② 암환자 48 개이스 (cancer)
- ✓ serum 3μl loading
- ✓ 12% SDS-PAGE
- ✓ 5% BSA blocking - 3hrs. RT.
- ✓ Santacruz mouse TAGM2 Ab. - 4°C. O/N.
- ✓ Blue : Normal
- ✓ Red : cancer

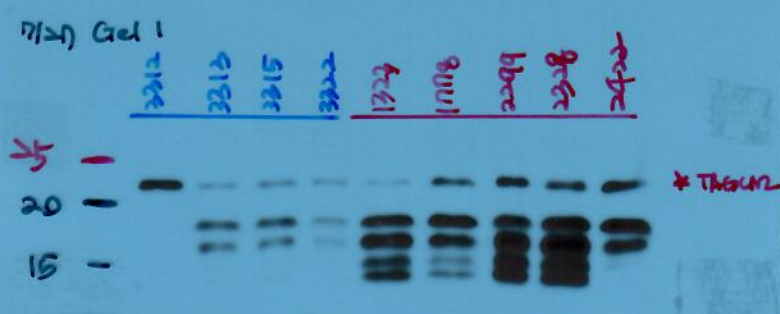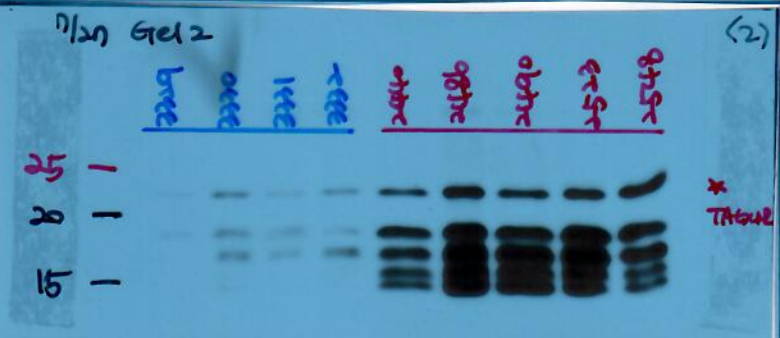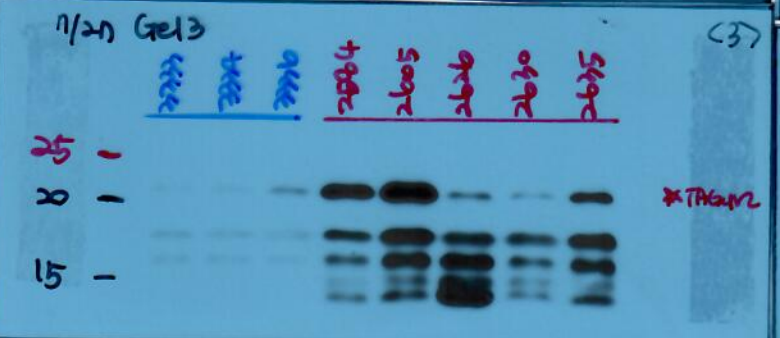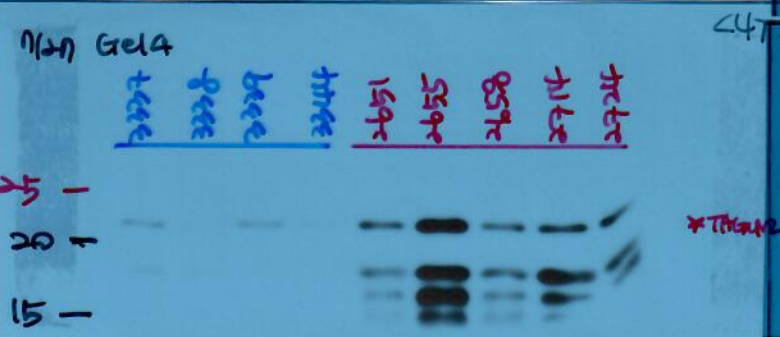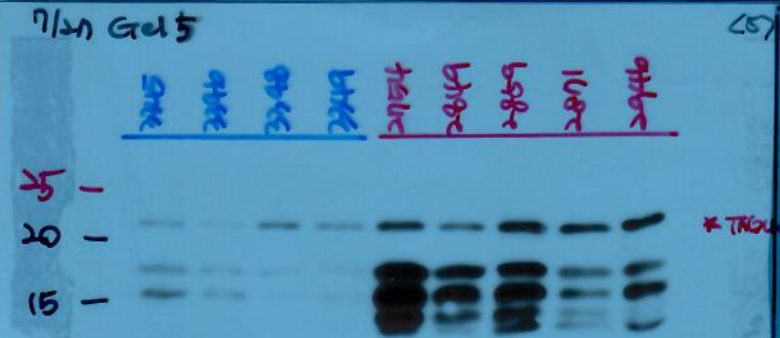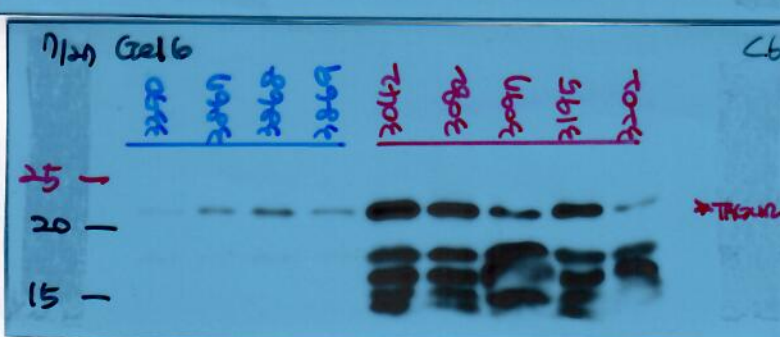

2019. 8. 27 develop. 1min. 30sec Exposure

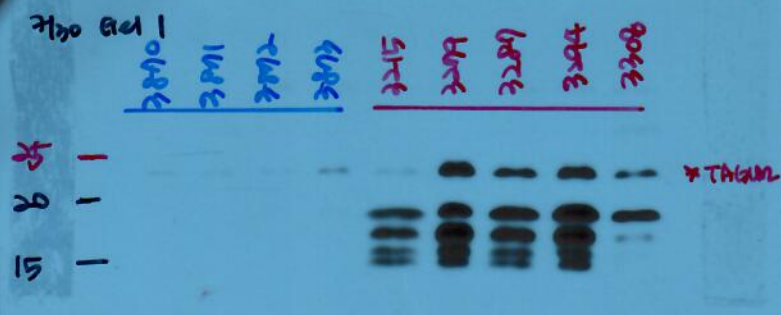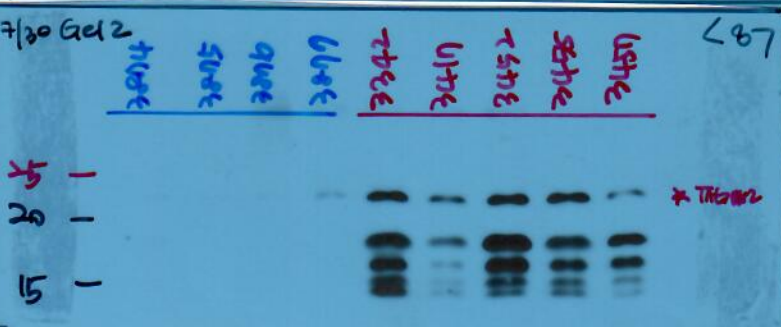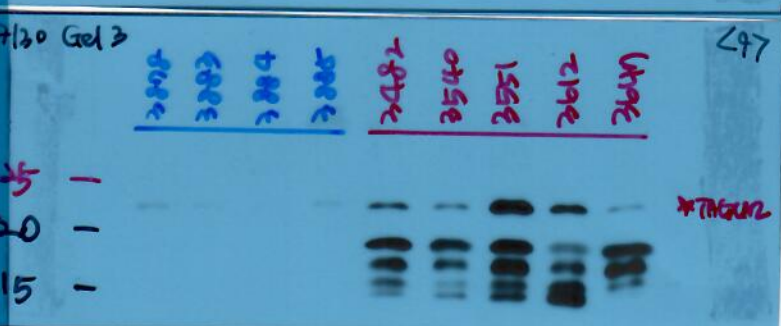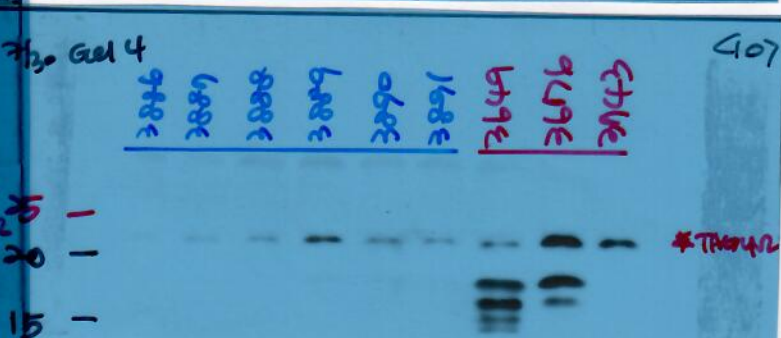



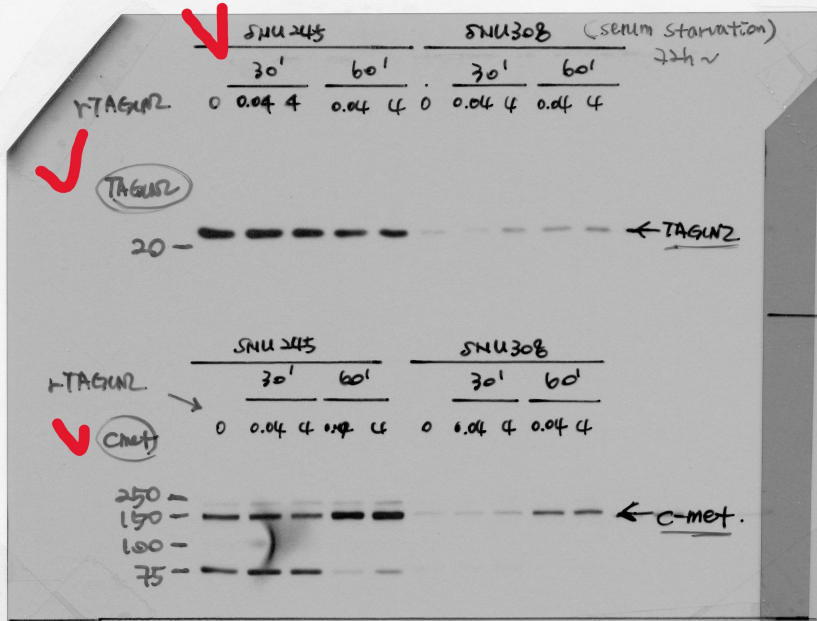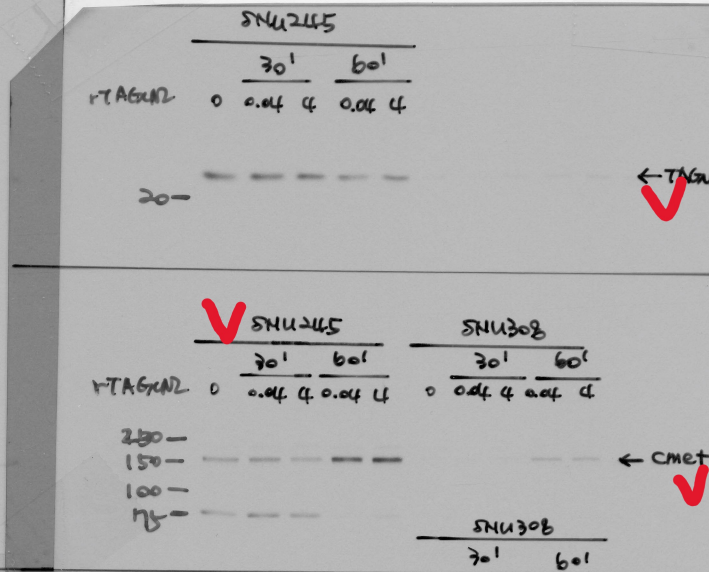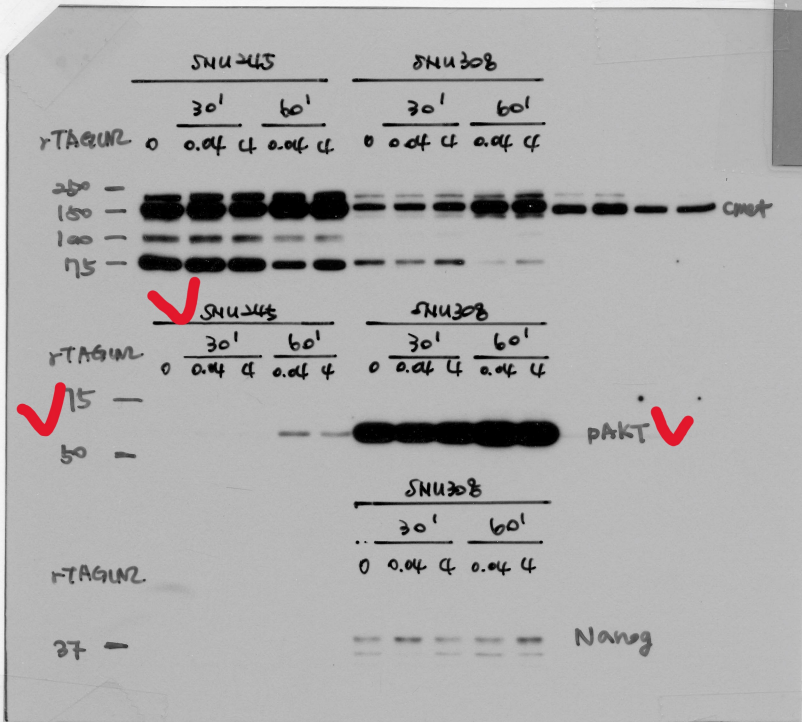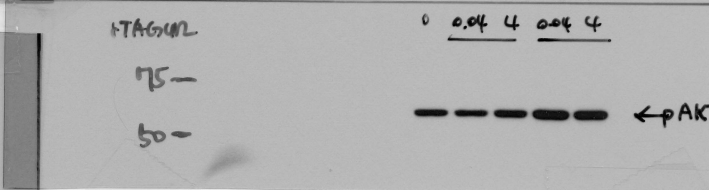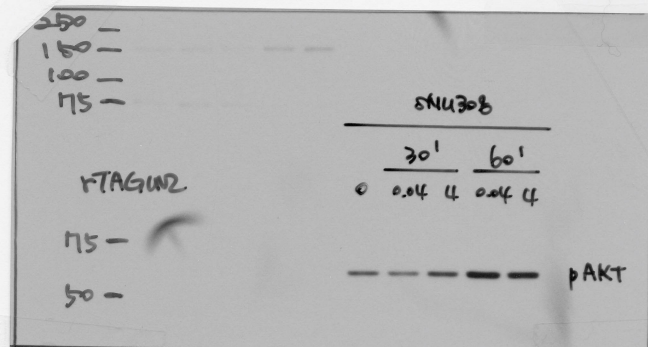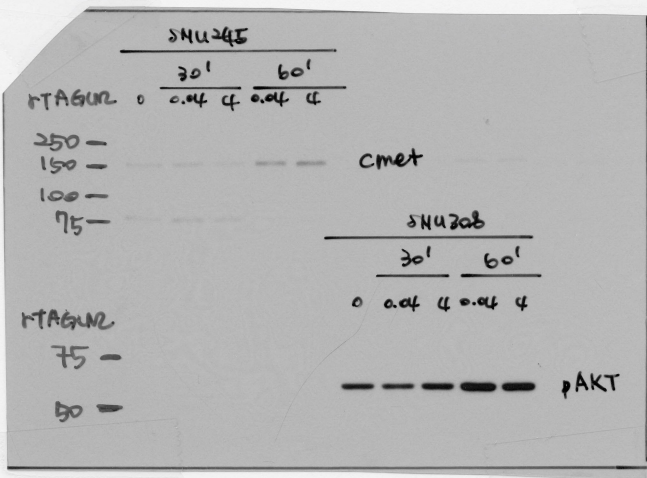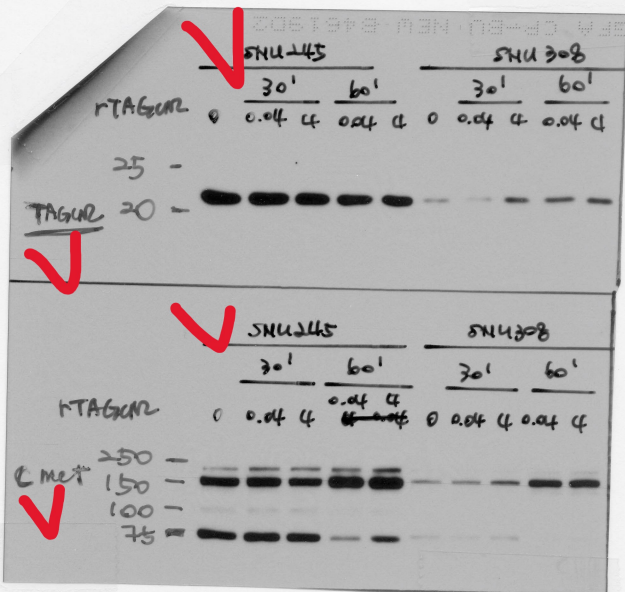

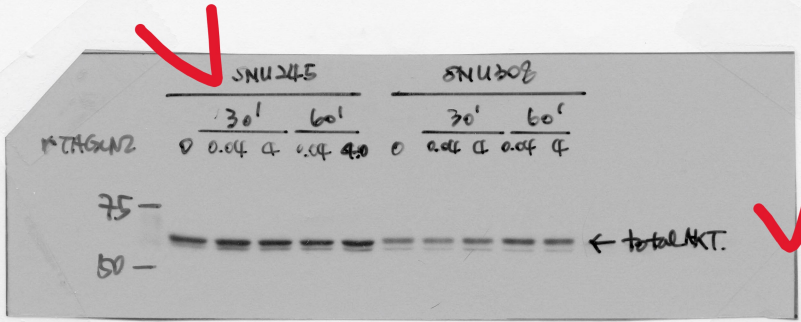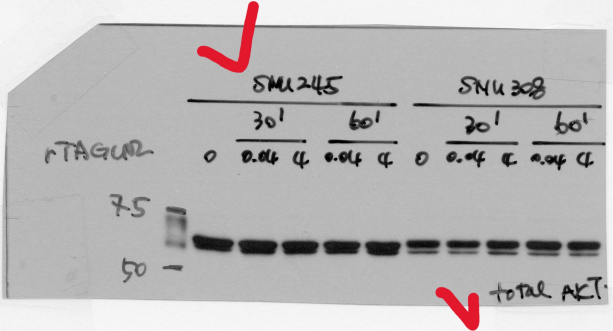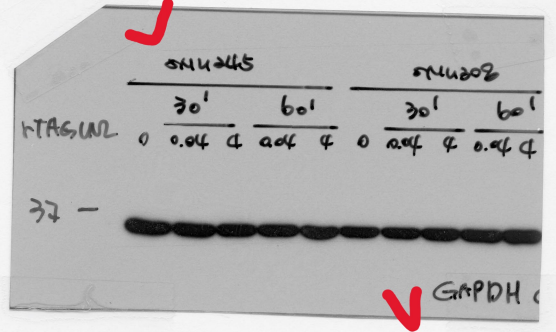



2023-11-22

SNU308, SNU869. - Adherent vs Sphere

1st revision

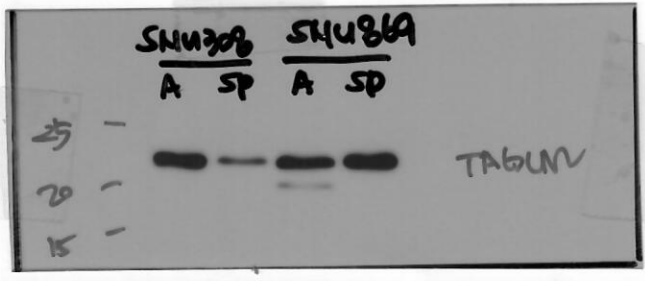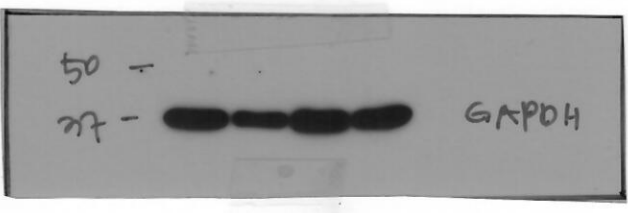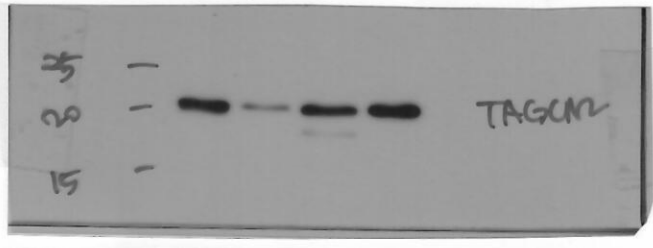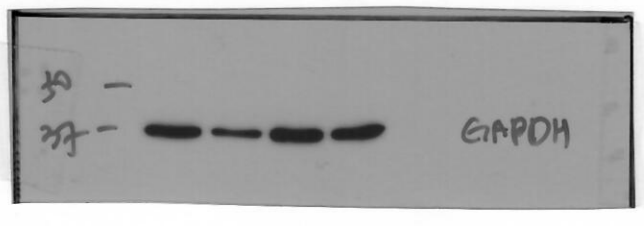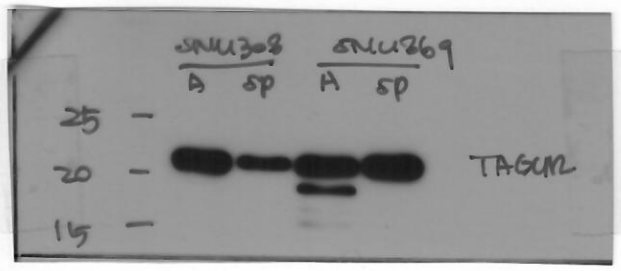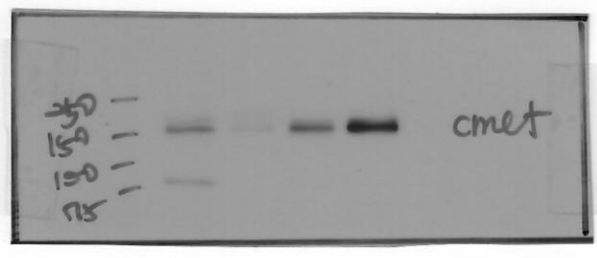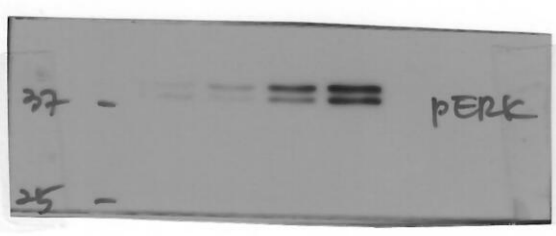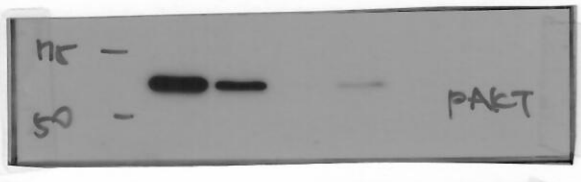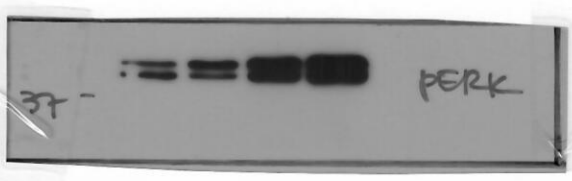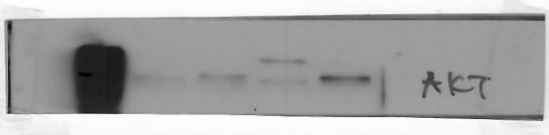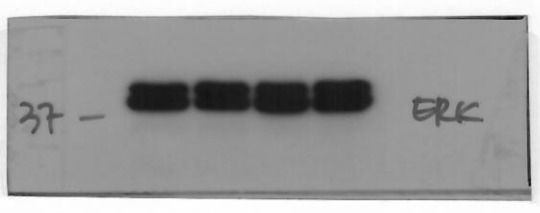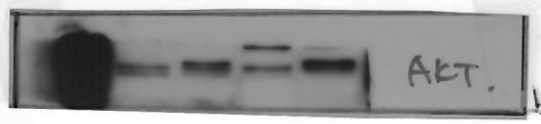

2024-01-17

SNU308 - SNU869 - Adherent vs sphere.

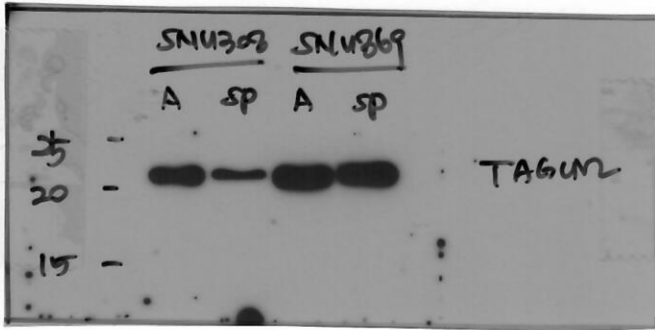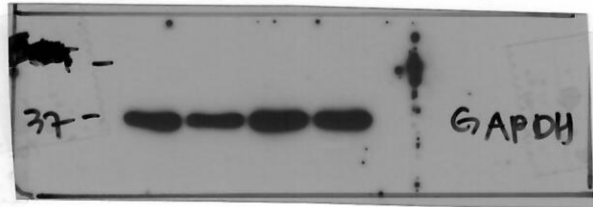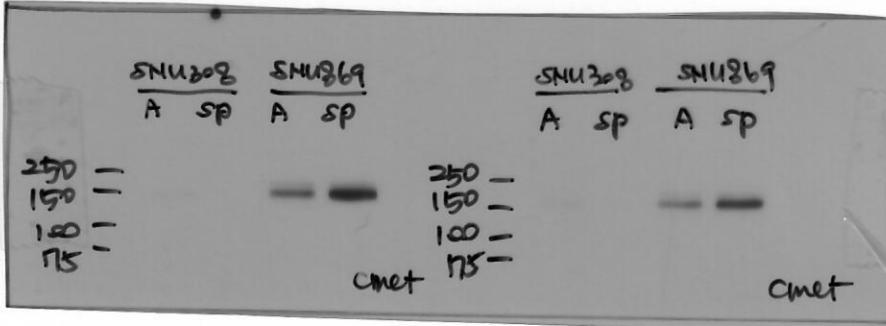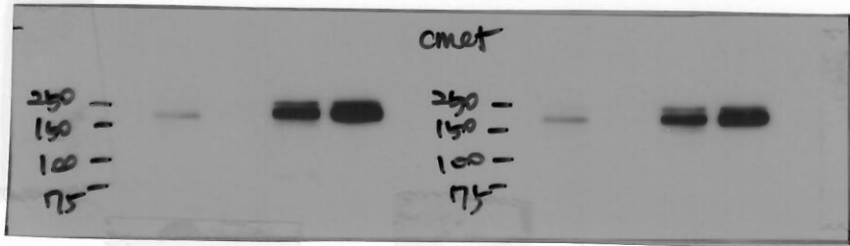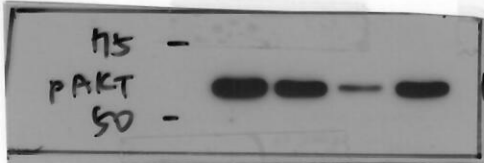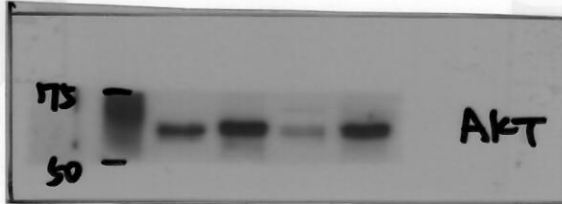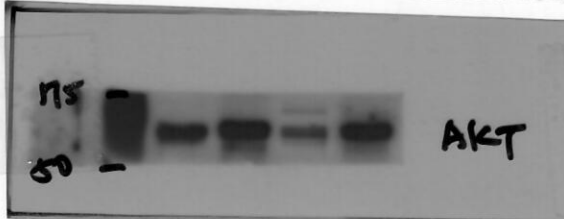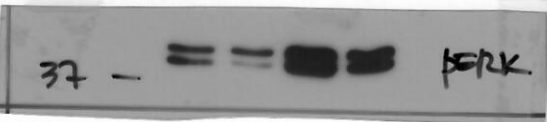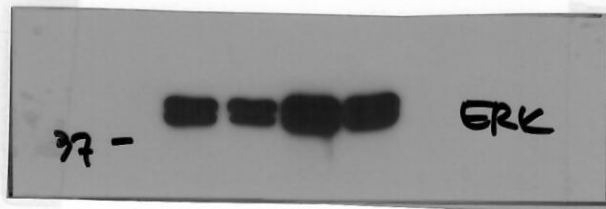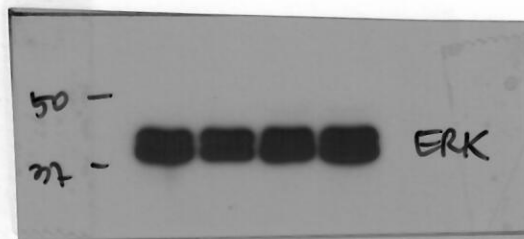

Supplement: MOESM3 [file 26883670]
